# Supplementary material for: Comparing the Postural Assessment Scale for Stroke and Berg Balance Scale for predicting community walking ability at discharge in subacute stroke: a prospective cohort study
Source: PeerJ. 2025 Apr 22;13:e19322. doi: 10.7717/peerj.19322 (PMC12024436; doi:10.7717/peerj.19322)
Supplement: Supplemental Information 1 [file peerj-13-19322-s001.xlsx]

## Sheet: Data
ID	BBS Baseline	PASS Baseline	FAC Discharge	6MWD Discharge	Walking ability at Discharge
1	15	19	2	59	Home ambulator
2	9	17	0	0	Home ambulator
3	51	33	5	420	Community ambulator
4	49	33	2	56	Home ambulator
5	50	33	5	217	Community ambulator
6	46	31	4	120	Home ambulator
7	50	33	5	375	Community ambulator
8	18	19	2	42	Home ambulator
9	49	32	5	235	Community ambulator
10	7	18	2	51	Home ambulator
11	53	35	5	370	Community ambulator
12	48	31	5	371	Community ambulator
13	32	28	3	82	Home ambulator
14	12	13	1	10	Home ambulator
15	21	21	2	65	Home ambulator
16	9	17	2	25	Home ambulator
17	49	31	5	410	Community ambulator
18	37	28	2	68	Home ambulator
19	52	32	5	240	Community ambulator
20	37	23	3	105	Home ambulator
21	6	10	1	22	Home ambulator
22	5	15	0	0	Home ambulator
23	16	21	2	65	Home ambulator
24	51	33	5	383	Community ambulator
25	53	36	5	347	Community ambulator
26	5	15	0	0	Home ambulator
27	33	24	2	58	Home ambulator
28	16	21	2	65	Home ambulator
29	49	26	5	355	Community ambulator
30	51	33	5	383	Community ambulator
31	53	36	5	347	Community ambulator
32	45	31	3	115	Home ambulator
33	54	34	5	345	Community ambulator
34	39	26	4	200	Home ambulator
35	34	27	2	29	Home ambulator
36	46	30	5	120	Home ambulator
37	51	32	5	343	Community ambulator
38	31	23	3	62	Home ambulator
39	23	18	1	25	Home ambulator
40	36	28	3	125	Home ambulator
41	15	21	1	25	Home ambulator
42	8	19	1	35	Home ambulator
43	46	29	5	405	Community ambulator
44	50	33	5	380	Community ambulator
45	6	14	1	15	Home ambulator
46	54	34	5	410	Community ambulator
